# Supplementary material for: A Network Pharmacology Approach to Reveal the Underlying Mechanisms of Paeonia lactiflora Pall. On the Treatment of Alzheimer’s Disease
Source: Hindawi journal article supplement (doi:10.1155/2019/8706589), 2019-11-16
Supplement: f1 [file 8706589.f1.pdf]

## Supplementary materials

Stable 1. The characteristics of compounds in PLP

| Name      | Mol ID                                                                                                                      | MW     | OB%    | DL   | HL    | BBB   |
|-----------|-----------------------------------------------------------------------------------------------------------------------------|--------|--------|------|-------|-------|
| MOL001934 | (3R,3aR,6S,7aR)-6-hydroxy-3,6-dimethyl-3a,4,7,7a-tetrahydro-3H-benzofuran-2,5-dione                                         | 198.24 | 104.94 | 0.08 | 13.69 | -0.32 |
| MOL001935 | (3aR,6S,7aR)-6-hydroxy-6-methyl-3-methylene-3a,4,7,7a-tetrahydrobenzofuran-2,5-dione                                        | 196.22 | 97.79  | 0.08 | 13.98 | -0.13 |
| MOL001917 | (3S,3aR,5S,6S,7aR)-5,6-dihydroxy-3,6-dimethyl-3,3a,4,5,7,7a-hexahydrobenzofuran-2-one                                       | 200.26 | 96.64  | 0.07 | 13.6  | -0.69 |
| MOL001918 | paeoniflorgenone                                                                                                            | 318.35 | 87.59  | 0.37 | 7.45  | -0.56 |
| MOL001931 | 4-Chlorobutyric acid                                                                                                        | 122.56 | 85.82  | 0.01 | 11.6  | 0.85  |
| MOL008707 | Ethylisobutyrate                                                                                                            | 116.18 | 83.67  | 0.01 | 11.14 | 1.49  |
| MOL001888 | 2,2-dimethylcyclohexanol                                                                                                    | 128.24 | 82.54  | 0.02 | 11.06 | 1.6   |
| MOL001937 | 24253-30-3                                                                                                                  | 98.16  | 74.2   | 0.01 | 11.36 | 1.57  |
| MOL001925 | paeoniflorin_qt                                                                                                             | 318.35 | 68.18  | 0.4  | 8.81  | -0.73 |
| MOL001928 | albiflorin_qt                                                                                                               | 318.35 | 66.64  | 0.33 | 6.54  | -0.88 |
| MOL001892 | Dipropyl phthalate                                                                                                          | 250.32 | 66.3   | 0.1  | 5.7   | 0.71  |
| MOL001910 | 11 $\alpha$ ,12 $\alpha$ -epoxy-3 $\beta$ -23-dihydroxy-30-norolean-20-en-28,12 $\beta$ -olide                              | 470.71 | 64.77  | 0.38 | 2.62  | -0.59 |
| MOL000676 | DBP                                                                                                                         | 278.38 | 64.54  | 0.13 | 5.41  | 0.56  |
| MOL001246 | (1R)-()-Nopinone                                                                                                            | 138.23 | 57.86  | 0.05 | 11.1  | 1.6   |
| MOL000612 | (-)- $\alpha$ -cedrene                                                                                                      | 204.39 | 55.56  | 0.1  | 4.82  | 2.16  |
| MOL000211 | Mairin                                                                                                                      | 456.78 | 55.38  | 0.78 | 8.87  | 0.22  |
| MOL000492 | (+)-catechin                                                                                                                | 290.29 | 54.83  | 0.24 | 0.61  | -0.73 |
| MOL001924 | paeoniflorin                                                                                                                | 480.51 | 53.87  | 0.79 | 13.88 | -1.86 |
| MOL001904 | 2 - methyl - 3 - (2 - propenyl) - phenol                                                                                    | 148.22 | 52.06  | 0.03 | 4.7   | 1.81  |
| MOL001909 | (Z)-(1S,5R)- $\beta$ -pinen-10-yl- $\beta$ -vicianoside_qt                                                                  | 152.26 | 50.32  | 0.06 | 11.47 | 1.93  |
| MOL001896 | bicyclo[3.1.1]hept-2-ene-2-methanol, 6,6-dimethyl-                                                                          | 152.26 | 49.79  | 0.06 | 11.54 | 1.34  |
| MOL001897 | ()-trans-Myrtanol                                                                                                           | 154.28 | 49.66  | 0.06 | 11.13 | 1.37  |
| MOL001921 | Lactiflorin                                                                                                                 | 462.49 | 49.12  | 0.8  | 7.26  | -1.76 |
| MOL004480 | acetic acid                                                                                                                 | 60.06  | 47.87  | 0    | 12.21 | 0.72  |
| MOL001898 | Acetyl oxide                                                                                                                | 102.1  | 45.13  | 0.01 | 11.84 | 0.77  |
| MOL000775 | EEE                                                                                                                         | 88.12  | 45.02  | 0    | 11.64 | 1.26  |
| MOL001919 | (3S,5R,8R,9R,10S,14S)-3,17-dihydroxy-4,4,8,10,14-pentamethyl-2,3,5,6,7,9-hexahydro-1H-cyclopenta[a]phenanthrene-15,16-dione | 358.52 | 43.56  | 0.53 | 4.34  | -0.41 |

|           |                                                                                                               |        |       |      |       |       |
|-----------|---------------------------------------------------------------------------------------------------------------|--------|-------|------|-------|-------|
| MOL001889 | Methyl linolelaidate                                                                                          | 294.53 | 41.93 | 0.17 | 5.78  | 1.11  |
| MOL000422 | kaempferol                                                                                                    | 286.25 | 41.88 | 0.24 | 14.74 | -0.55 |
| MOL001895 | Dibutylphenol                                                                                                 | 206.36 | 38.9  | 0.06 | 10.76 | 1.87  |
| MOL000358 | $\beta$ -sitosterol                                                                                           | 414.79 | 36.91 | 0.75 | 5.36  | 0.99  |
| MOL000359 | sitosterol                                                                                                    | 414.79 | 36.91 | 0.75 | 5.37  | 0.87  |
| MOL001893 | BU3                                                                                                           | 90.14  | 34.87 | 0.01 | 11.25 | -0.01 |
| MOL001801 | salicylic acid                                                                                                | 138.13 | 32.13 | 0.03 | 12    | 0.63  |
| MOL001936 | cis-5-Octen-1-ol                                                                                              | 128.24 | 31.84 | 0.01 | 5.4   | 1.15  |
| MOL000513 | 3,4,5-trihydroxybenzoic acid                                                                                  | 170.13 | 31.69 | 0.04 | 11.78 | -0.54 |
| MOL000219 | BOX                                                                                                           | 121.12 | 31.55 | 0.02 | 12.07 | 0.84  |
| MOL001930 | benzoyl paeoniflorin                                                                                          | 584.62 | 31.27 | 0.75 | -1.85 | -1.24 |
| MOL001906 | Methylgallate                                                                                                 | 184.16 | 30.91 | 0.05 | 5.67  | 0.06  |
| MOL000263 | oleanolic acid                                                                                                | 456.78 | 29.02 | 0.76 |       | 0.07  |
| MOL000874 | paeonol                                                                                                       | 166.19 | 28.79 | 0.04 |       | 0.84  |
| MOL001219 | Satol                                                                                                         | 268.54 | 27.27 | 0.11 |       | 0.97  |
| MOL001891 | 9-methylenefluorene                                                                                           | 178.24 | 26.87 | 0.09 |       | 1.78  |
| MOL001912 | albiflorin R1 qt                                                                                              | 318.35 | 26.18 | 0.34 |       | -0.85 |
| MOL001907 | Progallin A                                                                                                   | 198.19 | 25.61 | 0.06 |       | 0.11  |
| MOL001913 | propyl (2R)-2-hydroxypropanoate                                                                               | 132.18 | 25.5  | 0.01 |       | 0.35  |
| MOL000876 | (6R,10R)-6,10,14-trimethylpentadeca<br>n-2-one                                                                | 268.54 | 23.3  | 0.1  |       | 1.35  |
| MOL001899 | ZINC02169908                                                                                                  | 268.54 | 23.3  | 0.1  |       | 1.24  |
| MOL000106 | PYG                                                                                                           | 126.12 | 22.98 | 0.02 |       | 0.79  |
| MOL000551 | Hederagenol                                                                                                   | 472.78 | 22.42 | 0.74 |       | -0.51 |
| MOL001933 | oxypaeoniflorin                                                                                               | 496.51 | 21.88 | 0.78 |       | -2.41 |
| MOL001902 | 3 $\beta$ ,23-dihydroxy-oleana-11,13(18)-di<br>en-28-oic acid                                                 | 470.76 | 21.53 | 0.75 |       | -0.62 |
| MOL001644 | Dodecanal                                                                                                     | 184.36 | 21.52 | 0.03 |       | 1.42  |
| MOL001911 | albiflorin R1                                                                                                 | 480.51 | 21.29 | 0.82 |       | -1.98 |
| MOL001393 | myristic acid                                                                                                 | 228.42 | 21.18 | 0.07 |       | 0.99  |
| MOL001929 | alexandrin                                                                                                    | 576.95 | 20.63 | 0.62 |       | -0.98 |
| MOL000357 | Sitogluside                                                                                                   | 576.95 | 20.63 | 0.62 |       | -0.93 |
| MOL001396 | PENTADECYLIC ACID                                                                                             | 242.45 | 20.18 | 0.08 |       | 0.88  |
| MOL001890 | octadec-9-ene                                                                                                 | 252.54 | 19.5  | 0.09 |       | 1.84  |
| MOL001218 | Pisol                                                                                                         | 186.38 | 18.5  | 0.03 |       | 1.06  |
| MOL000610 | TRD                                                                                                           | 184.41 | 17.89 | 0.03 |       | 1.96  |
| MOL001923 | [(3S,3aR,6S,7aR)-6-hydroxy-6-meth<br>yl-2,5-dioxo-3a,4,7,7a-tetrahydro-3H<br>-benzofuran-3-yl]methyl benzoate | 318.35 | 17.84 | 0.3  |       | -0.66 |
| MOL000860 | stearic acid                                                                                                  | 284.54 | 17.83 | 0.14 |       | 1.22  |
| MOL001905 | 3 $\beta$ -hydroxy-oleana-11,13(18)-dien-2<br>8-oic acid?                                                     | 454.76 | 17.11 | 0.76 |       | -0.13 |
| MOL001922 | 2-Hexyl-1-decanol                                                                                             | 242.5  | 17.08 | 0.07 |       | 1.03  |
| MOL001900 | Pulchrenoside A qt                                                                                            | 472.78 | 16.91 | 0.77 |       | -0.58 |

|           |                                                         |        |       |      |       |
|-----------|---------------------------------------------------------|--------|-------|------|-------|
| MOL000875 | Cedrol                                                  | 222.41 | 16.23 | 0.12 | 1.46  |
| MOL000561 | Astragalin                                              | 448.41 | 14.03 | 0.74 | -1.97 |
| MOL001903 | 3 $\beta$ -hydroxy-11-oxo-olean-12-en-28-oic acid       | 470.76 | 13.49 | 0.74 | -0.2  |
| MOL001927 | albiflorin                                              | 480.51 | 12.09 | 0.77 | -2.19 |
| MOL001901 | 24-Methylenecycloartanol                                | 440.83 | 10.4  | 0.79 | 1.13  |
| MOL007465 | 10-Methylnonadecane                                     | 282.62 | 10.28 | 0.12 | 1.79  |
| MOL000867 | Heptadekan                                              | 240.53 | 8.64  | 0.07 | 1.87  |
| MOL000868 | LFA                                                     | 282.62 | 8.46  | 0.13 | 1.8   |
| MOL000869 | Henicosane                                              | 296.65 | 8.41  | 0.15 | 1.8   |
| MOL005089 | Oxypaeoniflorin                                         | 496.51 | 8.38  | 0.78 | -2.33 |
| MOL001402 | Octacosane                                              | 394.86 | 8.15  | 0.37 | 1.46  |
| MOL001894 | Bicetyl                                                 | 450.98 | 8.03  | 0.46 | 1.71  |
| MOL001914 | gallotannin                                             | 1701.2 | 7.36  | 0.03 | -7.15 |
|           | 7                                                       |        |       |      |       |
| MOL000842 | sucrose                                                 | 342.34 | 7.17  | 0.23 | -6.67 |
| MOL001908 | (Z)-(1S,5R)- $\beta$ -pinen-10-yl- $\beta$ -vicianoside | 446.55 | 5.74  | 0.67 | -1.89 |
| MOL001915 | paeonoside                                              | 610.57 | 3.47  | 0.71 | -3.73 |
| MOL001932 | galloylpaeoniflorin                                     | 632.62 | 3.03  | 0.42 | -2.78 |
| MOL001926 | 1,2,3,6-tetra-O-galloylglucose                          | 788.62 | 3.01  | 0.34 | -4.03 |
| MOL009092 | Pentagalloylglucose                                     | 940.72 | 3.01  | 0.21 | -4.17 |

Stable 2. The compound-related targets

| Compounds           | Targets                                            | Uniprot ID | Gene name |
|---------------------|----------------------------------------------------|------------|-----------|
| $\beta$ -sitosterol | Tyrosyl-DNA phosphodiesterase 1                    | Q9NUW8     | TDP1      |
| $\beta$ -sitosterol | Androgen receptor                                  | P10275     | AR        |
| $\beta$ -sitosterol | 3-hydroxy-3-methylglutaryl-coenzyme A reductase    | P04035     | HMGCR     |
| $\beta$ -sitosterol | Lanosterol 14- $\alpha$ demethylase                | Q16850     | CYP51A1   |
| $\beta$ -sitosterol | Oxysterols receptor LXR- $\beta$                   | P55055     | NR1H2     |
| $\beta$ -sitosterol | Oxysterols receptor LXR- $\alpha$                  | Q13133     | NR1H3     |
| $\beta$ -sitosterol | Cytochrome P450 19A1                               | P11511     | CYP19A1   |
| $\beta$ -sitosterol | Steroid 17- $\alpha$ -hydroxylase/17               | P05093     | CYP17A1   |
| $\beta$ -sitosterol | Low-density lipoprotein receptor                   | P01130     | LDLR      |
| $\beta$ -sitosterol | Very low-density lipoprotein receptor              | P98155     | VLDLR     |
| $\beta$ -sitosterol | Low-density lipoprotein receptor-related protein 8 | Q14114     | LRP8      |
| $\beta$ -sitosterol | Estrogen receptor                                  | P03372     | ESR1      |
| $\beta$ -sitosterol | Estrogen receptor $\beta$                          | Q92731     | ESR2      |
| $\beta$ -sitosterol | Sodium-dependent noradrenaline transporter         | P23975     | SLC6A2    |
| $\beta$ -sitosterol | Sodium-dependent serotonin transporter             | P31645     | SLC6A4    |
| $\beta$ -sitosterol | Nuclear receptor coactivator 2                     | Q15596     | NCOA2     |

|              |                                                                             |        |        |
|--------------|-----------------------------------------------------------------------------|--------|--------|
| β-sitosterol | Prostaglandin G/H synthase 1                                                | P23219 | PTGS1  |
| β-sitosterol | Prostaglandin G/H synthase 2                                                | P35354 | PTGS2  |
| β-sitosterol | Heat shock protein HSP 90                                                   | P07900 | HSP90  |
| β-sitosterol | Phosphatidylinositol-4,5-bisphosphate 3-kinase catalytic subunit, γ isoform | P48736 | PIK3CG |
| β-sitosterol | mRNA of PKA Catalytic Subunit C-α                                           | P17612 | PRKACA |
| β-sitosterol | Muscarinic acetylcholine receptor M1                                        | P11229 | CHRM1  |
| β-sitosterol | γ-aminobutyric-acid receptor α-2 subunit                                    | P47869 | GABRA2 |
| β-sitosterol | Muscarinic acetylcholine receptor M2                                        | P08172 | CHRM2  |
| β-sitosterol | A-1B adrenergic receptor                                                    | P35368 | ADRA1B |
| β-sitosterol | Apoptosis regulator Bcl-2                                                   | P10415 | BCL2   |
| β-sitosterol | Apoptosis regulator BAX                                                     | Q07812 | BAX    |
| β-sitosterol | Transcription factor AP-1                                                   | P05412 | JUN    |
| β-sitosterol | Potassium voltage-gated channel subfamily H member 2                        | Q12809 | KCNH2  |
| β-sitosterol | Dopamine D1 receptor                                                        | P21728 | DRD1   |
| β-sitosterol | Muscarinic acetylcholine receptor M3                                        | P20309 | CHRM3  |
| β-sitosterol | Sodium channel protein type 5 subunit α                                     | Q14524 | SCN5A  |
| β-sitosterol | Muscarinic acetylcholine receptor M4                                        | P08173 | CHRM4  |
| β-sitosterol | CGMP-inhibited 3',5'-cyclic phosphodiesterase A                             | Q14432 | PDE3A  |
| β-sitosterol | 5-hydroxytryptamine 2A receptor                                             | P28223 | HTR2A  |
| β-sitosterol | γ-aminobutyric-acid receptor α-5 subunit                                    | P31644 | GABRA5 |
| β-sitosterol | A-1A adrenergic receptor                                                    | P35348 | ADRA1A |
| β-sitosterol | γ-aminobutyric-acid receptor α-3 subunit                                    | P34903 | GABRA3 |
| β-sitosterol | B-2 adrenergic receptor                                                     | P07550 | ADRB2  |
| β-sitosterol | Neuronal acetylcholine receptor subunit α-2                                 | Q15822 | CHRNA2 |
| β-sitosterol | Mu-type opioid receptor                                                     | P35372 | OPRM1  |
| β-sitosterol | Neuronal acetylcholine receptor protein, α-7 chain                          | P36544 | CHRNA7 |
| β-sitosterol | Caspase-9                                                                   | P55211 | CASP9  |
| β-sitosterol | Caspase-8                                                                   | Q14790 | CASP8  |
| β-sitosterol | Transforming growth factor β-1                                              | P01137 | TGFB1  |
| β-sitosterol | Serum paraoxonase/arylesterase 1                                            | P27169 | PON1   |
| β-sitosterol | Microtubule-associated protein 2                                            | P11137 | MAP2   |
| β-sitosterol | Sterol regulatory element binding transcription factor 2                    | Q12772 | SREBF2 |
| β-sitosterol | ATP-binding cassette, sub-family G (WHITE), member 8                        | Q9H221 | ABCG8  |
| β-sitosterol | ATP-binding cassette, sub-family G (WHITE), member 5                        | Q9H222 | ABCG5  |
| β-sitosterol | Apolipoprotein E                                                            | P02649 | APOE   |
| β-sitosterol | 24-dehydrocholesterol reductase                                             | Q15392 | DHCR24 |
| β-sitosterol | Caspase 3                                                                   | P42574 | CASP3  |
| β-sitosterol | Sterol regulatory element binding transcription                             | P36956 | SREBF1 |

|              |                                                               |        |         |
|--------------|---------------------------------------------------------------|--------|---------|
|              | factor 1                                                      |        |         |
| β-sitosterol | ATP-binding cassette, sub-family B (MDR/TAP), member 11       | O95342 | ABCB11  |
| β-sitosterol | Intercellular adhesion molecule 1                             | P05362 | ICAM1   |
| β-sitosterol | Cytochrome P450, family 7, subfamily A, polypeptide 1         | P22680 | CYP7A1  |
| Kaempferol   | Cytochrome P450 1A2                                           | P05177 | CYP1A2  |
| Kaempferol   | Multidrug resistance protein 1                                | P08183 | ABCB1   |
| Kaempferol   | Arachidonate 5-lipoxygenase                                   | P09917 | ALOX5   |
| Kaempferol   | Estradiol 17-β-dehydrogenase 1                                | P14061 | HSD17B1 |
| Kaempferol   | Aldose reductase                                              | P15121 | AKR1B1  |
| Kaempferol   | Arachidonate 15-lipoxygenase                                  | P16050 | ALOX15  |
| Kaempferol   | Arachidonate 12-lipoxygenase                                  | P18054 | ALOX12  |
| Kaempferol   | Multidrug resistance-associated protein 1                     | P33527 | ABCC1   |
| Kaempferol   | Estradiol 17-β-dehydrogenase 2                                | P37059 | HSD17B2 |
| Kaempferol   | Xanthine dehydrogenase/oxidase                                | P47989 | XDH     |
| Kaempferol   | Dual specificity tyrosine-phosphorylation-regulated kinase 1A | Q13627 | DYRK1A  |
| Kaempferol   | NADPH oxidase 4                                               | Q9NPH5 | NOX4    |
| Kaempferol   | Tyrosyl-DNA phosphodiesterase 1                               | Q9NUW8 | TDP1    |
| Kaempferol   | Nitric oxide synthase, inducible                              | P35228 | NOS2    |
| Kaempferol   | Peroxisome proliferator activated receptor γ                  | P37231 | PPARG   |
| Kaempferol   | Dipeptidyl peptidase IV                                       | P27487 | DPP4    |
| Kaempferol   | Trypsin-1                                                     | P07477 | PRSS1   |
| Kaempferol   | Thrombin                                                      | P00734 | F2      |
| Kaempferol   | Nitric oxide synthase, endothelial                            | P29474 | NOS3    |
| Kaempferol   | Acetylcholinesterase                                          | P22303 | ACHE    |
| Kaempferol   | DNA topoisomerase II                                          | P11388 | TOP2    |
| Kaempferol   | Coagulation factor VII                                        | P08709 | F7      |
| Kaempferol   | Calmodulin                                                    | P0DP23 | CALM    |
| Kaempferol   | Transcription factor p65                                      | Q04206 | RELA    |
| Kaempferol   | Inhibitor of nuclear factor kappa-B kinase subunit β          | O14920 | IKBKB   |
| Kaempferol   | RAC-α serine/threonine-protein kinase                         | P31749 | AKT1    |
| Kaempferol   | Activator of 90 kDa heat shock protein ATPase homolog 1       | O95433 | AHSA1   |
| Kaempferol   | Mitogen-activated protein kinase 8                            | P45983 | MAPK8   |
| Kaempferol   | Interstitial collagenase                                      | P03956 | MMP1    |
| Kaempferol   | Signal transducer and activator of transcription 1-α/β        | P42224 | STAT1   |
| Kaempferol   | Heme oxygenase 1                                              | P09601 | HMOX1   |
| Kaempferol   | Cytochrome P450 3A4                                           | P08684 | CYP3A4  |
| Kaempferol   | Cytochrome P450 1A1                                           | P04798 | CYP1A1  |
| Kaempferol   | Intercellular adhesion molecule 1                             | P05362 | ICAM1   |

|             |                                                                            |        |         |
|-------------|----------------------------------------------------------------------------|--------|---------|
| Kaempferol  | E-selectin                                                                 | P16581 | SELE    |
| Kaempferol  | Vascular cell adhesion protein 1                                           | P19320 | VCAM1   |
| Kaempferol  | Hyaluronan synthase 2                                                      | Q92819 | HAS2    |
| Kaempferol  | Glutathione S-transferase P                                                | P09211 | GSTP1   |
| Kaempferol  | 26S proteasome non-ATPase regulatory subunit 3                             | O43242 | PSMD3   |
| Kaempferol  | Solute carrier family 2, facilitated glucose transporter member 4          | P14672 | GLUT4   |
| Kaempferol  | Nuclear receptor subfamily 1 group I member 3                              | Q14994 | NR1I3   |
| Kaempferol  | Insulin receptor                                                           | P06213 | INSR    |
| Kaempferol  | Type I iodothyronine deiodinase                                            | P49895 | DIO1    |
| Kaempferol  | Serine/threonine-protein phosphatase 2B catalytic subunit $\alpha$ isoform | Q08209 | PPP3CA  |
| Kaempferol  | Peroxidase C1A                                                             | P00433 | PRXC1A  |
| Kaempferol  | Glutathione S-transferase Mu 1                                             | P09488 | GSTM1   |
| Kaempferol  | Glutathione S-transferase Mu 2                                             | P28161 | GSTM2   |
| Kaempferol  | Aldo-keto reductase family 1 member C3                                     | P42330 | AKR1C3  |
| Kaempferol  | Antileukoproteinase                                                        | P03973 | SLPI    |
| Kaempferol  | Cyclin-dependent kinase 1                                                  | P06493 | CDK1    |
| Kaempferol  | Nuclear receptor subfamily 1, group I, member 2                            | O75469 | NR1I2   |
| Kaempferol  | Cytochrome P450, family 1, subfamily B, polypeptide 1                      | Q16678 | CYP1B1  |
| Kaempferol  | Ribosomal protein S6 kinase $\alpha$ -3                                    | P51812 | RPS6KA3 |
| Kaempferol  | Aryl hydrocarbon receptor                                                  | P35869 | AHR     |
| Kaempferol  | UDP glucuronosyltransferase 1 family, polypeptide A3                       | P35503 | UGT1A3  |
| Kaempferol  | UDP glucuronosyltransferase 1 family, polypeptide A8                       | Q9HAW9 | UGT1A8  |
| Kaempferol  | UDP glucuronosyltransferase 1 family, polypeptide A7                       | Q9HAW7 | UGT1A7  |
| Kaempferol  | UDP glucuronosyltransferase 1 family, polypeptide A9                       | O60656 | UGT1A9  |
| Lactiflorin | Galectin-9                                                                 | O00182 | LGALS9  |
| Lactiflorin | Galectin-3                                                                 | P17931 | LGALS3  |
| Lactiflorin | Galectin-9B                                                                | Q3B8N2 | LGALS9B |
| Lactiflorin | Galectin-9C                                                                | Q6DKI2 | LGALS9C |
| Lactiflorin | Platelet-activating factor receptor                                        | P25105 | PTAFR   |
| Mairin      | Aldo-keto reductase family 1 member B10                                    | O60218 | AKR1B10 |
| Mairin      | DNA polymerase $\beta$                                                     | P06746 | POLB    |
| Mairin      | Aldose reductase                                                           | P15121 | AKR1B1  |
| Mairin      | Aldo-keto reductase family 1 member B15                                    | C9JRZ8 | AKR1B15 |
| Mairin      | Alcohol dehydrogenase [NADP(+)]                                            | P14550 | AKR1A1  |
| Mairin      | 5-anhydro-D-fructose reductase                                             | Q96JD6 | AKR1E2  |
| Mairin      | Microtubule-associated protein tau                                         | P10636 | MAPT    |
| Mairin      | Corticosteroid 11- $\beta$ -dehydrogenase isozyme 1                        | P28845 | HSD11B1 |

|                   |                                                                               |        |        |          |
|-------------------|-------------------------------------------------------------------------------|--------|--------|----------|
| Mairin            | Hydroxysteroid 11- $\beta$ -dehydrogenase protein                             | 1-like | Q7Z5J1 | HSD11B1L |
| Mairin            | Bile acid receptor                                                            |        | Q96RI1 | NR1H4    |
| Mairin            | M-phase inducer phosphatase 1                                                 |        | P30304 | CDC25A   |
| Mairin            | M-phase inducer phosphatase 2                                                 |        | P30305 | CDC25B   |
| Mairin            | DNA topoisomerase 2- $\alpha$                                                 |        | P11388 | TOP2A    |
| Mairin            | DNA topoisomerase 2- $\beta$                                                  |        | Q02880 | TOP2B    |
| Mairin            | Progesterone receptor                                                         |        | P06401 | PGR      |
| Mairin            | Cytochrome c, somatic                                                         |        | P99999 | CYCS     |
| Mairin            | Pancreatic lipase                                                             |        | P16233 | PNLIP    |
| Mairin            | Sp1 transcription factor                                                      |        | P08047 | SP1      |
| Mairin            | Nitric oxide synthase 3, <i>endothelial</i>                                   |        | P29474 | NOS3     |
| Mairin            | Lamin B1                                                                      |        | P20700 | LMNB1    |
| Mairin            | Caspase 3                                                                     |        | P42574 | CASP3    |
| Mairin            | v-akt murine thymoma viral oncogene homolog 1                                 |        | P31749 | AKT1     |
| Mairin            | Baculoviral IAP repeat containing 5                                           |        | O15392 | BIRC5    |
| Mairin            | Topoisomerase (DNA) I                                                         |        | P11387 | TOP1     |
| Paeoniflorigenone | $\gamma$ -aminobutyric acid receptor subunit $\alpha$ -1                      |        | P14867 | GABRA1   |
| Paeoniflorin      | Galectin-9                                                                    |        | O00182 | LGALS9   |
| Paeoniflorin      | Galectin-3                                                                    |        | P17931 | LGALS3   |
| Paeoniflorin      | Galectin-9B                                                                   |        | Q3B8N2 | LGALS9B  |
| Paeoniflorin      | Galectin-9C                                                                   |        | Q6DKI2 | LGALS9C  |
| Paeoniflorin      | Sodium-dependent noradrenaline transporter                                    |        | P23975 | SLC6A2   |
| Paeoniflorin      | Sodium- and chloride-dependent glycine transporter 1                          |        | P48067 | SLC6A9   |
| Paeoniflorin      | Sodium-dependent dopamine transporter                                         |        | Q01959 | SLC6A3   |
| Paeoniflorin      | Sodium-dependent serotonin transporter                                        |        | P31645 | SLC6A4   |
| Paeoniflorin      | Sodium-dependent proline transporter                                          |        | Q99884 | SLC6A7   |
| Paeoniflorin      | Sodium- and chloride-dependent neutral and basic amino acid transporter B(0+) |        | Q9UN76 | SLC6A14  |
| Paeoniflorin      | Sodium- and chloride-dependent glycine transporter 2                          |        | Q9Y345 | SLC6A5   |
| Paeoniflorin      | Interleukin-6                                                                 |        | P05231 | IL6      |
| Paeoniflorin      | Monocyte differentiation antigen CD14                                         |        | P08571 | CD14     |
| Paeoniflorin      | Tumor necrosis factor                                                         |        | P01375 | TNF      |
| Paeoniflorin      | Lipopolysaccharide-binding protein                                            |        | P18428 | LBP      |
| Paeoniflorin      | Heat shock transcription factor 1                                             |        | Q00613 | HSF1     |
| Paeoniflorin      | Toll-like receptor 4                                                          |        | O00206 | TLR4     |
| Paeoniflorin      | Interleukin 8                                                                 |        | P10145 | IL8      |
| Palbinone         | Androgen receptor                                                             |        | P10275 | AR       |
| Palbinone         | Progesterone receptor                                                         |        | P06401 | PGR      |
| Palbinone         | Mineralocorticoid receptor                                                    |        | P08235 | NR3C2    |

Stable 3. The AD-related targets

| Gene name | Target name                                                | UniProt ID |
|-----------|------------------------------------------------------------|------------|
| HTR1A     | 5-hydroxytryptamine 1A receptor                            | P08908     |
| HTR4      | 5-hydroxytryptamine 4 receptor                             | Q13639     |
| ADRA2C    | A-2C adrenergic receptor                                   | P18825     |
| MAOA      | Amine oxidase [flavin-containing] A                        | P21397     |
| MAOB      | Amine oxidase [flavin-containing] B                        | P27338     |
| GABRA1    | $\gamma$ -aminobutyric acid receptor subunit $\alpha$ -1   | P14867     |
| GABRA2    | $\gamma$ -aminobutyric acid receptor subunit $\alpha$ -2   | P47869     |
| GABRB2    | $\gamma$ -aminobutyric acid receptor subunit $\beta$ -2    | P47870     |
| HPGDS     | Glutathione S-transferase                                  | O60760     |
| INSR      | Insulin receptor                                           | P06213     |
| CHRM4     | Muscarinic acetylcholine receptor M5                       | P08173     |
| CHRM3     | Muscarinic acetylcholine receptor M3                       | P20309     |
| CHRM1     | Muscarinic acetylcholine receptor M1                       | P11229     |
| CHRM2     | Muscarinic acetylcholine receptor M2                       | P08172     |
| CHRNB2    | Nicotinic ACh receptor $\beta$ 2                           | P17787     |
| CHRNA4    | Nicotinic ACh receptor $\alpha$ 4                          | P43681     |
| GRIN1     | NMDA receptor                                              | Q05586     |
| TSPO      | Peripheral-type benzodiazepine receptor                    | P30536     |
| PTGS1     | Prostaglandin G/H synthase 1                               | P23219     |
| SSTR1     | Somatostatin receptor 1                                    | P30872     |
| SSTR2     | Somatostatin receptor type 2                               | P30874     |
| SSTR3     | Somatostatin receptor type 3                               | P32745     |
| SSTR5     | Somatostatin receptor type 5                               | P35346     |
| SLC18A2   | Synaptic vesicle amine transporter                         | Q05940     |
| AGTR1     | Type-1 angiotensin II receptor                             | P30556     |
| BACE1     | $\beta$ -secretase 1                                       | P56817     |
| BACE2     | $\beta$ -secretase 2                                       | Q9Y5Z0     |
| PSENEN    | $\gamma$ -secretase                                        | Q9NZ42     |
| CCR2      | C-C chemokine receptor type 2                              | P41597     |
| GRIA1     | Glutamate receptor 1                                       | P42261     |
| HRH3      | Histamine H3 receptor                                      | Q9Y5N1     |
| GRM1      | Metabotropic glutamate receptor 1                          | Q13255     |
| GRM2      | Metabotropic glutamate receptor 2                          | Q14416     |
| GRM5      | Metabotropic glutamate receptor 5                          | P41594     |
| PTGES     | Prostaglandin E synthase                                   | O14684     |
| NGFR      | Tumor necrosis factor receptor superfamily member 16       | P08138     |
| SNCA      | A-synuclein                                                | P37840     |
| ACHE      | Acetylcholinesterase                                       | P22303     |
| APP       | Amyloid $\beta$ A4 protein                                 | P05067     |
| DRD2      | D(2) dopamine receptor                                     | P14416     |
| CHRNA7    | Neuronal acetylcholine receptor protein, $\alpha$ -7 chain | P36544     |



|         |                                                                            |        |
|---------|----------------------------------------------------------------------------|--------|
| PTGS2   | Prostaglandin G/H synthase 2                                               | P35354 |
| GSK3B   | Glycogen synthase kinase-3 $\beta$                                         | P49841 |
| MICAL2  | Microtubule associated monooxygenase, calponin and LIM domain containing 2 | O94851 |
| DYNC1I1 | Dynein, cytoplasmic 1, intermediate chain 1                                | O14576 |
| RPH3A   | Rabphilin 3A                                                               | Q9Y2J0 |
| ATP2B1  | ATPase, Ca <sup>2+</sup> transporting, plasma membrane 1                   | P20020 |
| ELMOD1  | ELMO/CED-12 domain containing 1                                            | Q8N336 |
| NELL2   | Protein kinase C-binding protein NELL2                                     | Q99435 |
| RASGRF1 | Ras protein-specific guanine nucleotide-releasing factor 1                 | Q13972 |
| CAMKK2  | Calcium/calmodulin-dependent protein kinase kinase 2                       | Q96RR4 |
| ICAM5   | Intercellular adhesion molecule 5                                          | Q9UMF0 |
| PAK1    | p21 protein (Cdc42/Rac)-activated kinase 1                                 | Q13153 |
| PSEN1   | Presenilin 1                                                               | P49768 |
| APOE    | Apolipoprotein E                                                           | P02649 |
| PSEN2   | Presenilin 2                                                               | P49810 |
| MAPT    | Microtubule Associated Protein Tau                                         | P10636 |
| TNF     | Tumor Necrosis Factor                                                      | P01375 |
| PRNP    | Prion Protein                                                              | P04156 |
| IL1B    | Interleukin 1 $\beta$                                                      | P01584 |
| ACE     | Angiotensin I Converting Enzyme                                            | P12821 |
| NOS3    | Nitric Oxide Synthase 3                                                    | P29474 |
| VEGFA   | Vascular Endothelial Growth Factor A                                       | P15692 |
| BDNF    | Brain Derived Neurotrophic Factor                                          | P23560 |
| SORL1   | Sortilin Related Receptor 1                                                | Q92673 |
| ABCA1   | ATP Binding Cassette Subfamily A Member 1                                  | O95477 |
| SQSTM1  | Sequestosome 1                                                             | Q13501 |
| CTSD    | Cathepsin D                                                                | P07339 |
| GFAP    | Glial Fibrillary Acidic Protein                                            | P14136 |
| BCHE    | Butyrylcholinesterase                                                      | P06276 |
| SOD1    | Superoxide Dismutase 1                                                     | P00441 |
| TF      | Transferrin                                                                | P02787 |
| CHAT    | Choline O-Acetyltransferase                                                | P28329 |
| ADAM10  | ADAM Metallopeptidase Domain 10                                            | O14672 |
| HFE     | Homeostatic Iron Regulator                                                 | Q30201 |
| MPO     | Myeloperoxidase                                                            | P05164 |
| GDNF    | Glial Cell Derived Neurotrophic Factor                                     | P39905 |
| SLC6A4  | Solute Carrier Family 6 Member 4                                           | P31645 |
| FAS     | Fas Cell Surface Death Receptor                                            | P25445 |
| GBA     | Glucosylceramidase B                                                       | P04062 |
| MME     | Membrane Metalloendopeptidase                                              | P08473 |
| MTND1   | Mitochondrially Encoded NADH:Ubiquinone Oxidoreductase Core Subunit 1      | P03886 |
| UCHL1   | Ubiquitin C-Terminal Hydrolase L1                                          | P09936 |

|          |                                                                       |        |
|----------|-----------------------------------------------------------------------|--------|
| PPARG    | Peroxisome Proliferator Activated Receptor Gamma                      | P37231 |
| LRRK2    | Leucine Rich Repeat Kinase 2                                          | Q5S007 |
| PLAU     | Urokinase-type plasminogen activator                                  | P00749 |
| LRP1     | LDL Receptor Related Protein 1                                        | Q07954 |
| PRKN     | Parkin RBR E3 Ubiquitin Protein Ligase                                | O60260 |
| CST3     | Cystatin C                                                            | P01034 |
| A2M      | A-2-Macroglobulin                                                     | P01023 |
| CAT      | Catalase                                                              | P04040 |
| MTHFR    | Methylenetetrahydrofolate Reductase                                   | P42898 |
| TTR      | Transthyretin                                                         | P02766 |
| TARDBP   | TAR DNA Binding Protein                                               | Q13148 |
| LPL      | Lipoprotein Lipase                                                    | P06858 |
| NGF      | Nerve Growth Factor                                                   | P01138 |
| IL6      | Interleukin 6                                                         | P05231 |
| INS      | Insulin                                                               | P01308 |
| MAPK1    | Mitogen-Activated Protein Kinase 1                                    | P28482 |
| ABCA7    | ATP Binding Cassette Subfamily A Member 7                             | Q8IZY2 |
| HSD17B10 | Hydroxysteroid 17-B Dehydrogenase 10                                  | Q99714 |
| LDLR     | Low Density Lipoprotein Receptor                                      | P01130 |
| SYN      | Synaptophysin                                                         | P08247 |
| GRN      | Granulin Precursor                                                    | P28799 |
| HMOX1    | Heme Oxygenase 1                                                      | P09601 |
| TNFRSF1A | TNF Receptor Superfamily Member 1A                                    | P19438 |
| ADAM17   | ADAM Metallopeptidase Domain 17                                       | P78536 |
| CD40     | CD40 Molecule                                                         | P25942 |
| MTND2    | Mitochondrially Encoded NADH:Ubiquinone Oxidoreductase Core Subunit 2 | P03891 |
| SNCB     | Synuclein B                                                           | Q16143 |
| CASP8    | Caspase 8                                                             | Q14790 |
| CRH      | Corticotropin Releasing Hormone                                       | P06850 |
| NCSTN    | Nicastrin                                                             | Q92542 |
| GRIN2B   | Glutamate Ionotropic Receptor NMDA Type Subunit 2B                    | Q13224 |
| PLD3     | Phospholipase D Family Member 3                                       | Q8IV08 |
| NTRK2    | Neurotrophic Receptor Tyrosine Kinase 2                               | Q16620 |
| MTCO1    | Mitochondrially Encoded Cytochrome C Oxidase I                        | P00395 |
| NTRK1    | Neurotrophic Receptor Tyrosine Kinase 1                               | P04629 |
| RELN     | Reelin                                                                | P78509 |
| PARK7    | Parkinsonism Associated Deglycase                                     | Q99497 |
| IL10     | Interleukin 10                                                        | P22301 |
| SLC6A3   | Solute Carrier Family 6 Member 3                                      | Q01959 |
| OLR1     | Oxidized Low Density Lipoprotein Receptor 1                           | P78380 |
| SERPINA3 | Serpin Family A Member 3                                              | P01011 |
| DKK1     | Dickkopf WNT Signaling Pathway Inhibitor 1                            | O94907 |
| CTSB     | Cathepsin B                                                           | P07858 |

|         |                                                               |        |
|---------|---------------------------------------------------------------|--------|
| PICALM  | Phosphatidylinositol Binding Clathrin Assembly Protein        | Q13492 |
| VLDLR   | Very Low Density Lipoprotein Receptor                         | P98155 |
| COL25A1 | Collagen Type XXV A 1 Chain                                   | Q9BXS0 |
| NPC1    | NPC Intracellular Cholesterol Transporter 1                   | O15118 |
| UBB     | Ubiquitin B                                                   | P0CG47 |
| DNM1L   | Dynamin 1 Like protein                                        | O00429 |
| CDK5    | Cyclin Dependent Kinase 5                                     | Q00535 |
| CLU     | Clusterin                                                     | P10909 |
| GRIN2A  | Glutamate Ionotropic Receptor NMDA Type Subunit 2A            | Q12879 |
| IL1A    | Interleukin 1 $\alpha$                                        | P01583 |
| COX5A   | Cytochrome C Oxidase Subunit 5A                               | P20674 |
| DHCR24  | 24-Dehydrocholesterol Reductase                               | Q15392 |
| CAPN1   | Calpain 1                                                     | P07384 |
| CASP3   | Caspase 3                                                     | P42574 |
| COMT    | Catechol-O-Methyltransferase                                  | P21964 |
| ITM2B   | Integral Membrane Protein 2B                                  | Q9Y287 |
| MTCO2   | Mitochondrially Encoded Cytochrome C Oxidase II               | P00403 |
| DYRK1A  | Dual Specificity Tyrosine Phosphorylation Regulated Kinase 1A | Q13627 |
| ITPR1   | Inositol 1,4,5-Trisphosphate Receptor Type 1                  | Q14643 |
| MSR1    | Macrophage Scavenger Receptor 1                               | P21757 |
| SEMA3A  | Semaphorin 3A                                                 | Q14563 |
| RYR1    | Ryanodine Receptor 1                                          | P21817 |
| CALM    | Calmodulin 1                                                  | P0DP23 |
| AKT1    | AKT Serine/Threonine Kinase 1                                 | P31749 |
| NOD2    | Nucleotide Binding Oligomerization Domain Containing 2        | Q9HC29 |
| TGFB1   | Transforming Growth Factor $\beta$ 1                          | P01137 |
| HTT     | Huntingtin                                                    | P42858 |
| TREM2   | Triggering Receptor Expressed On Myeloid Cells 2              | Q9NZC2 |
| EIF2AK3 | Eukaryotic Translation Initiation Factor 2 A Kinase 3         | Q9NZJ5 |
| IFNG    | Interferon $\gamma$                                           | P01579 |
| SLC1A3  | Solute Carrier Family 1 Member 3                              | P43003 |
| TP53    | Tumor Protein P53                                             | P04637 |
| HTR2A   | 5-Hydroxytryptamine Receptor 2A                               | P28223 |
| ATP7B   | ATPase Copper Transporting B                                  | P35670 |
